# Supplementary material for: Facile synthesis of loaf-like ZnMn2O4 nanorods and their excellent performance in Li-ion batteries
Source: Royal Society of Chemistry journal article supplement (doi:10.1039/c3nr33211j), 2013-01-01
Supplement: c3nr33211j.pdf [file c3nr33211j.pdf]

*Supporting information for*

## Facile Synthesis of Loaf-like $\text{ZnMn}_2\text{O}_4$ Nanorods and Their Excellent Performance on Li-ion Batteries

Zhongchao Bai,<sup>a\*</sup> Na Fan,<sup>b</sup> Changhui Sun,<sup>b</sup> Zhicheng Ju,<sup>b</sup> Chunli Guo,<sup>a</sup> Jian Yang,<sup>c\*</sup> Yitai Qian<sup>bc</sup>

*a* Research Institute of Surface Engineering, Taiyuan University of Technology, Taiyuan, 030024, China. Tel.: +86 351 6010540. E-mail: [baizhongchao@tyut.edu.cn](mailto:baizhongchao@tyut.edu.cn)

*b* Hefei National Laboratory for Physical Science at Microscale and Department of Chemistry, University of Science and Technology of China, Hefei, 230026, China

*c* School of Chemistry and Chemical Engineering, Shandong University, Jinan 250100, China Email: [yangjian@sdu.edu.cn](mailto:yangjian@sdu.edu.cn)

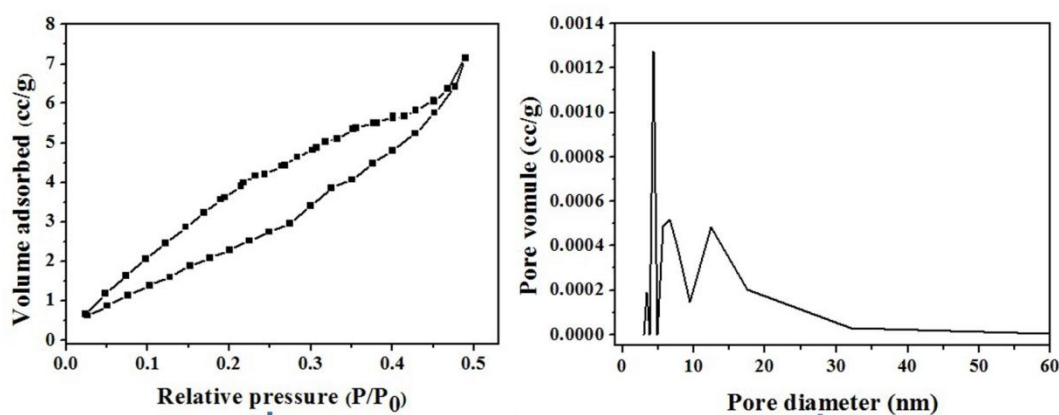

**Figure S1** Nitrogen adsorption-desorption isotherms (a) and pore-size-distribution curves (b) of the loaf-like  $\text{ZnMn}_2\text{O}_4$  nanorods.

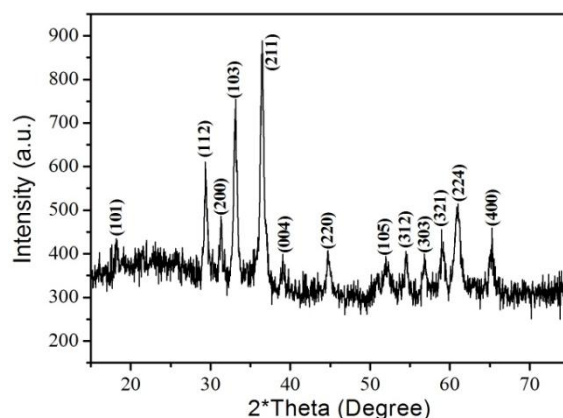

**Figure S2** The XRD pattern of  $\text{ZnMn}_2\text{O}_4$  synthesized at 600 °C.

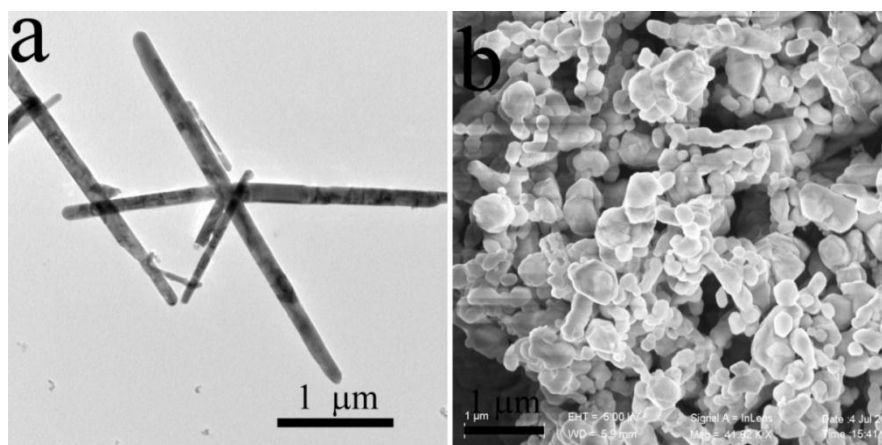

**Figure S3** (a) TEM image of ZnMn<sub>2</sub>O<sub>4</sub> prepared at 800 °C for 2 h and (b) SEM image of ZnMn<sub>2</sub>O<sub>4</sub> obtained at 700 °C for 10 h.
